# Supplementary material for: Anomalous excitonic resonance Raman effects in few-layered MoS2
Source: Royal Society of Chemistry journal article supplement (doi:10.1039/c4nr05785f), 2015-01-01
Supplement: c4nr05785f1.pdf [file c4nr05785f1.pdf]

# Electronic Supplementary Information (ESI)

## Anomalous excitonic resonance Raman effects in few-layer MoS<sub>2</sub>

*Jae-Ung Lee,<sup>1,†</sup> Jaesung Park,<sup>1,†</sup> Young-Woo Son<sup>2</sup> and Hyeonsik Cheong<sup>1,\*</sup>*

<sup>1</sup>Department of Physics, Sogang University, Seoul 121-742, Korea

<sup>2</sup>School of Computational Sciences, Korean Institute for Advanced Study, Seoul 130-722, Korea

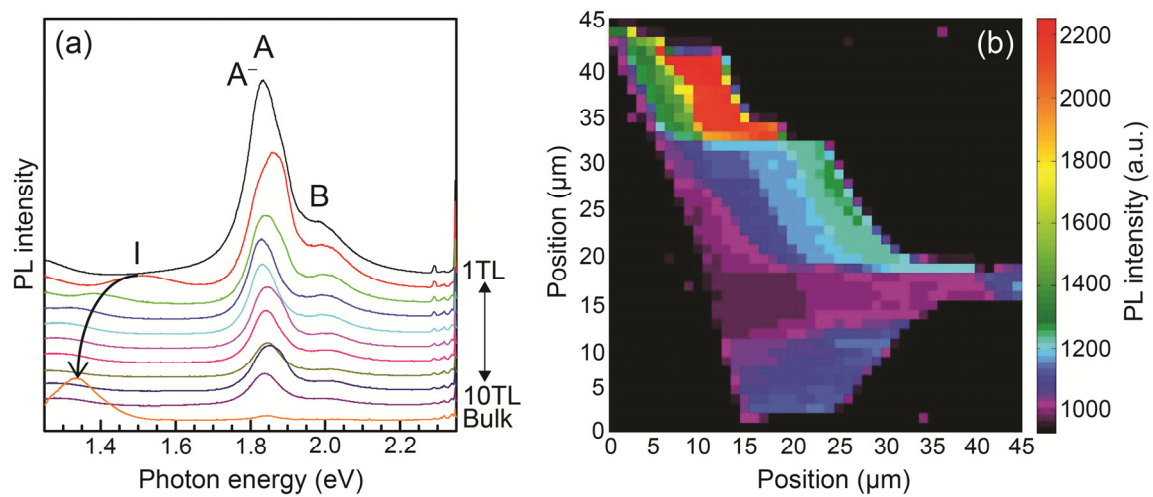

**Figure S1.** (a) Photoluminescence (PL) spectra of few-layer MoS<sub>2</sub>. (b) PL intensity image of A excitation.

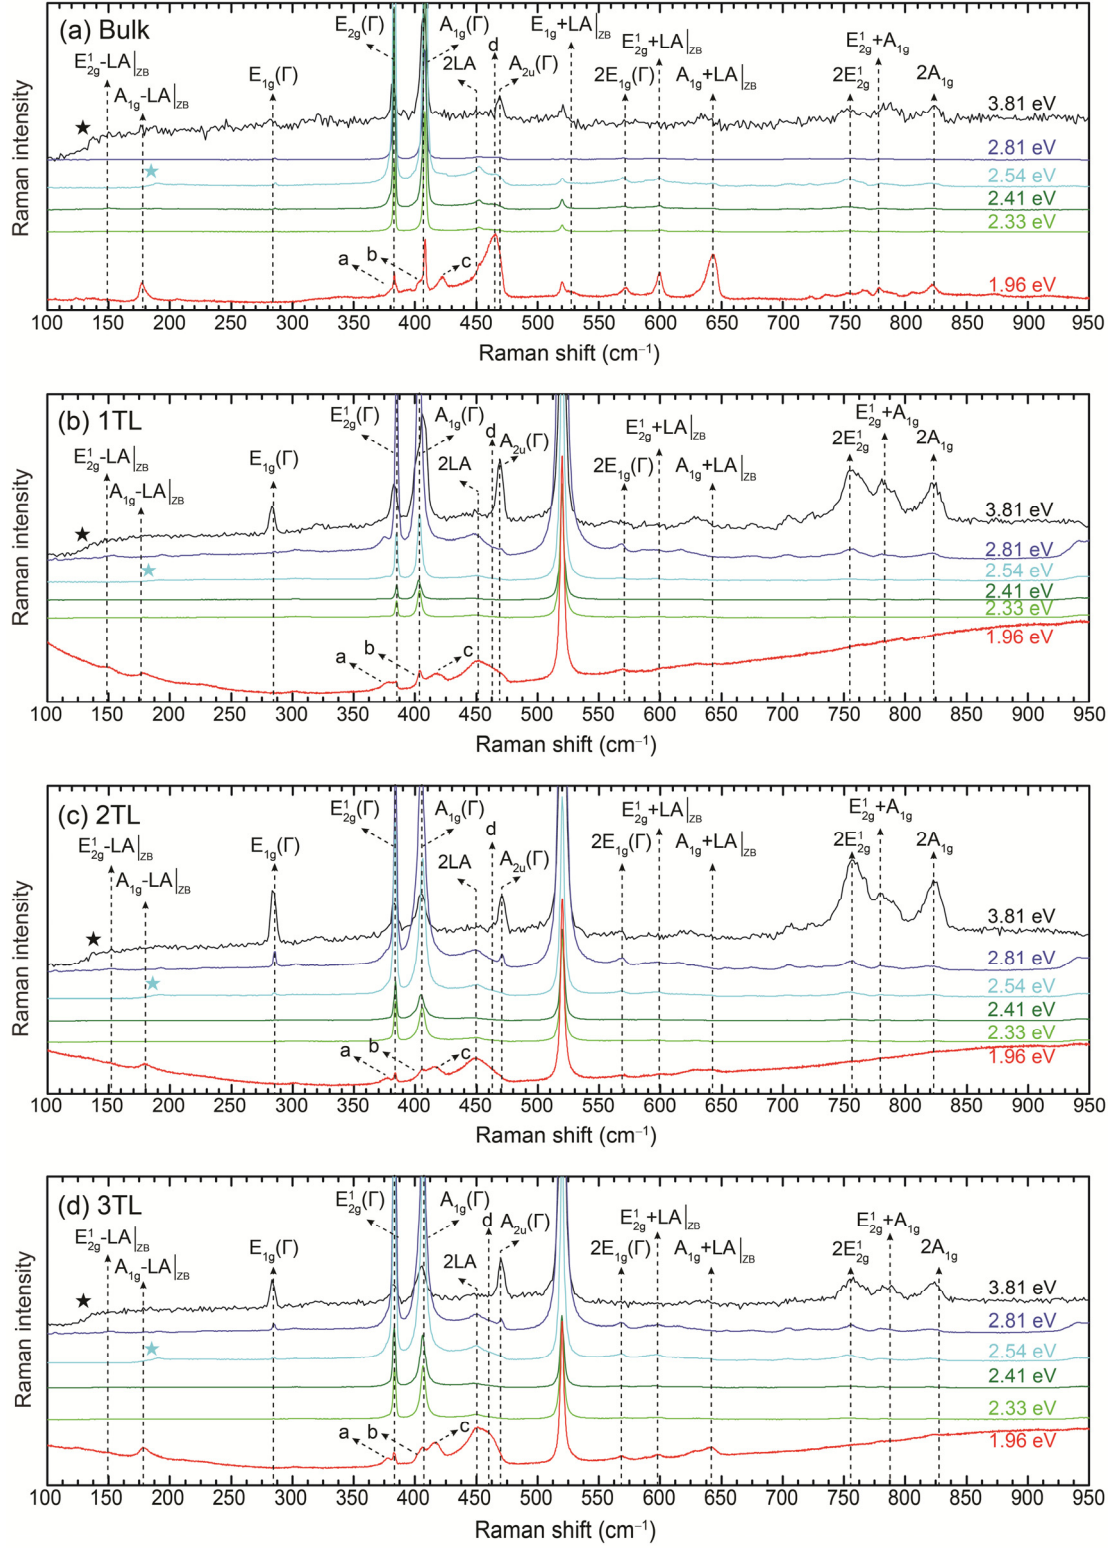

**Figure S2.** Raman spectra of (a) bulk, (b) 1TL, (c) 2TL, and (d) 3TL MoS<sub>2</sub> measured with 6 excitation energies: 3.81 eV, 2.81 eV, 2.54 eV, 2.41 eV, 2.33 eV, and 1.96 eV. Features indicated by (★) are experimental artefacts due to the cutoff of the edge filters.

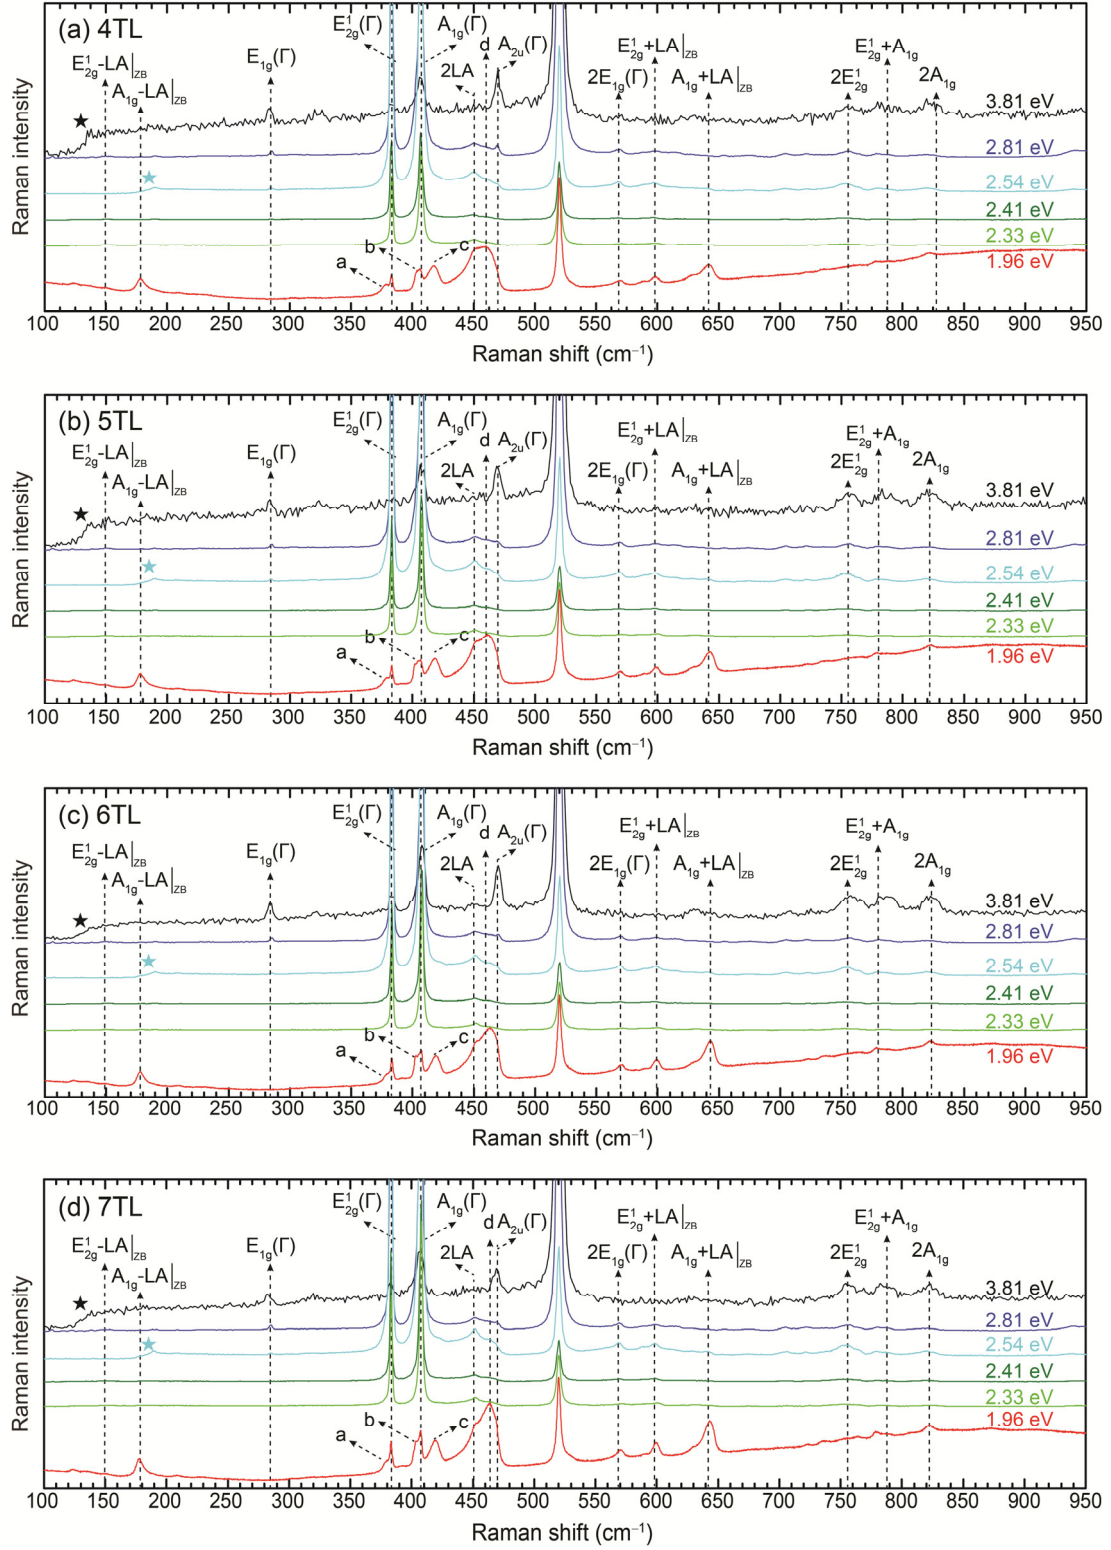

**Figure S3.** Raman spectra of (a) 4TL, (b) 5TL, (c) 6TL, and (d) 7TL MoS<sub>2</sub> measured with 6 excitation energies: 3.81 eV, 2.81 eV, 2.54 eV, 2.41 eV, 2.33 eV, and 1.96 eV. Features indicated by (★) are experimental artefacts due to the cutoff of the edge filters.

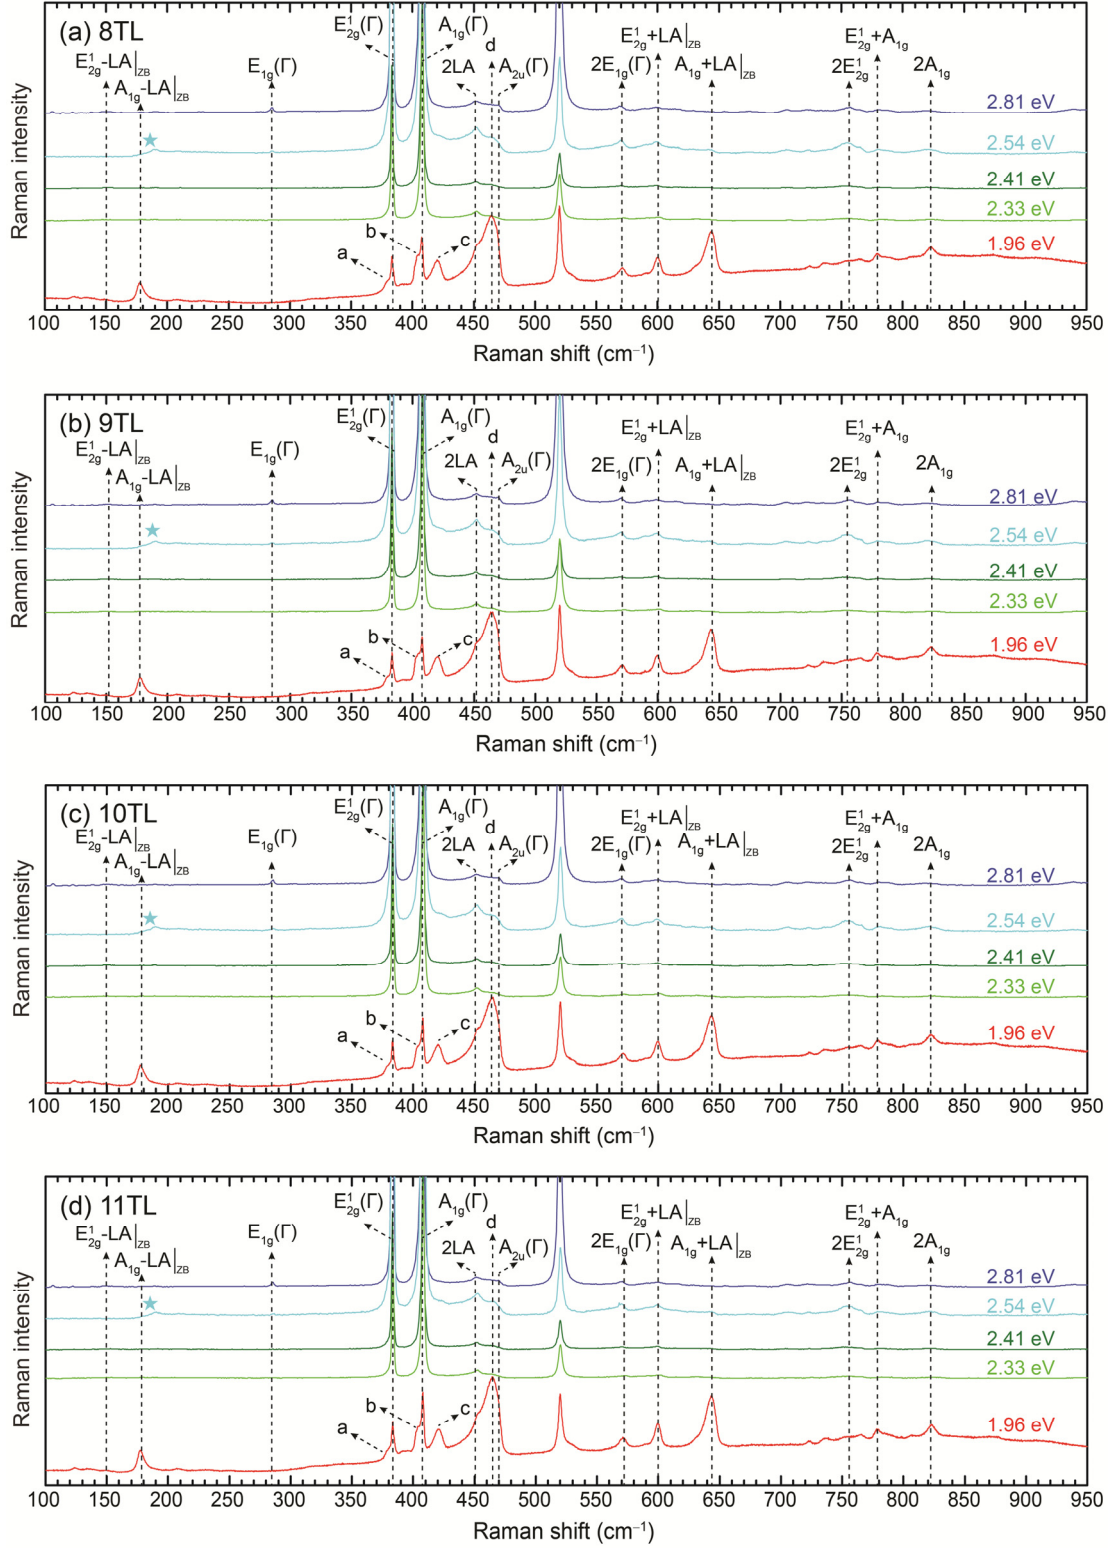

**Figure S4.** Raman spectra of (a) 8TL, (b) 9TL, (c) 10TL, and (d) 11TL MoS<sub>2</sub> measured with 5 excitation energies: 2.81 eV, 2.54 eV, 2.41 eV, 2.33 eV, and 1.96 eV. Features indicated by (★) are experimental artefacts due to the cutoff of the edge filters.



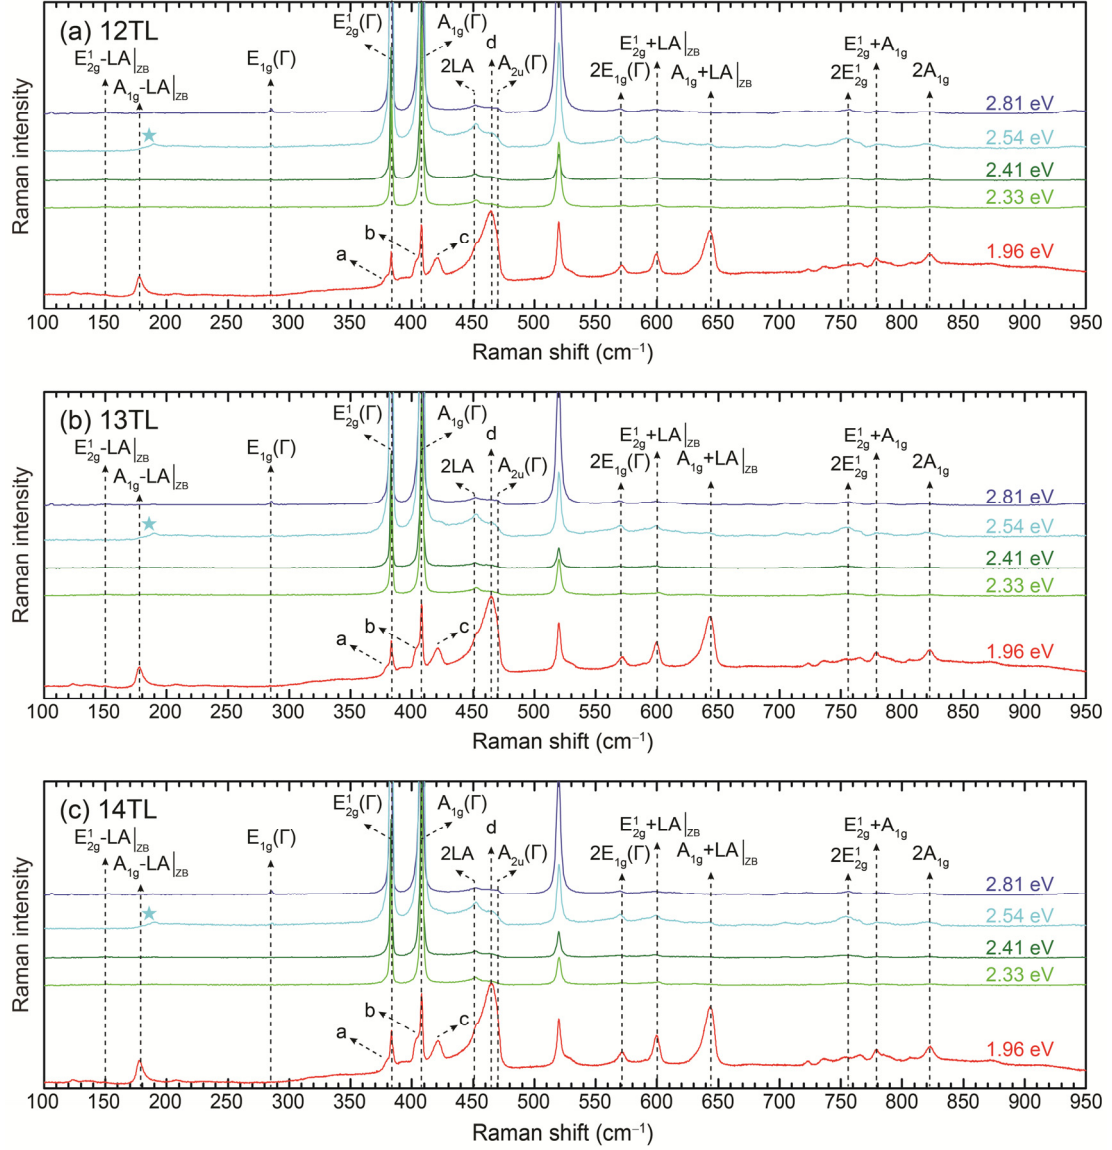

**Figure S5.** Raman spectra of (a) 12TL, (b) 13TL, and (c) 14TL MoS<sub>2</sub> measured with 5 excitation energies: 2.81 eV, 2.54 eV, 2.41 eV, 2.33 eV, and 1.96 eV. Features indicated by (★) are experimental artefacts due to the cutoff of the edge filters.

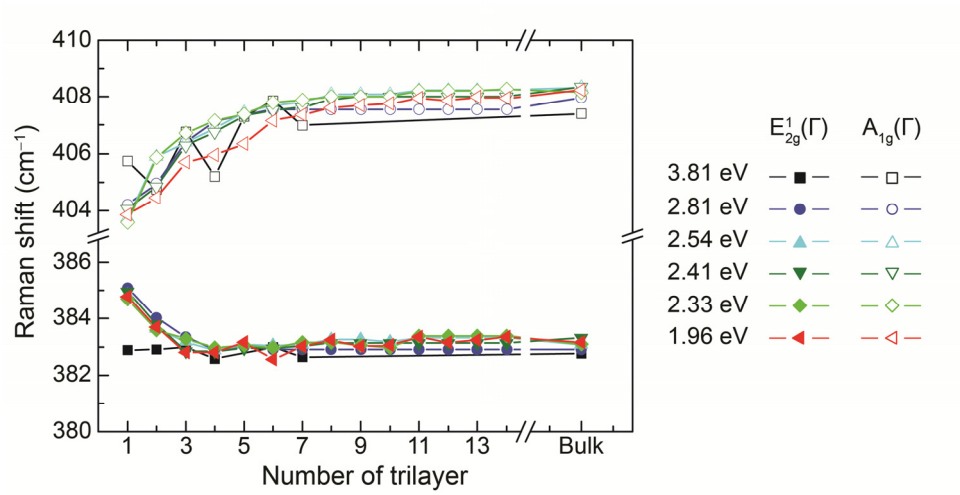

**Figure S6.** Peak positions of  $E_{2g}^1$  and  $A_{1g}$  modes up to 14TL and bulk for 6 excitation energies. The data for the 3.81 eV excitation show larger scatter due to a lower spectral resolution at short wavelengths.

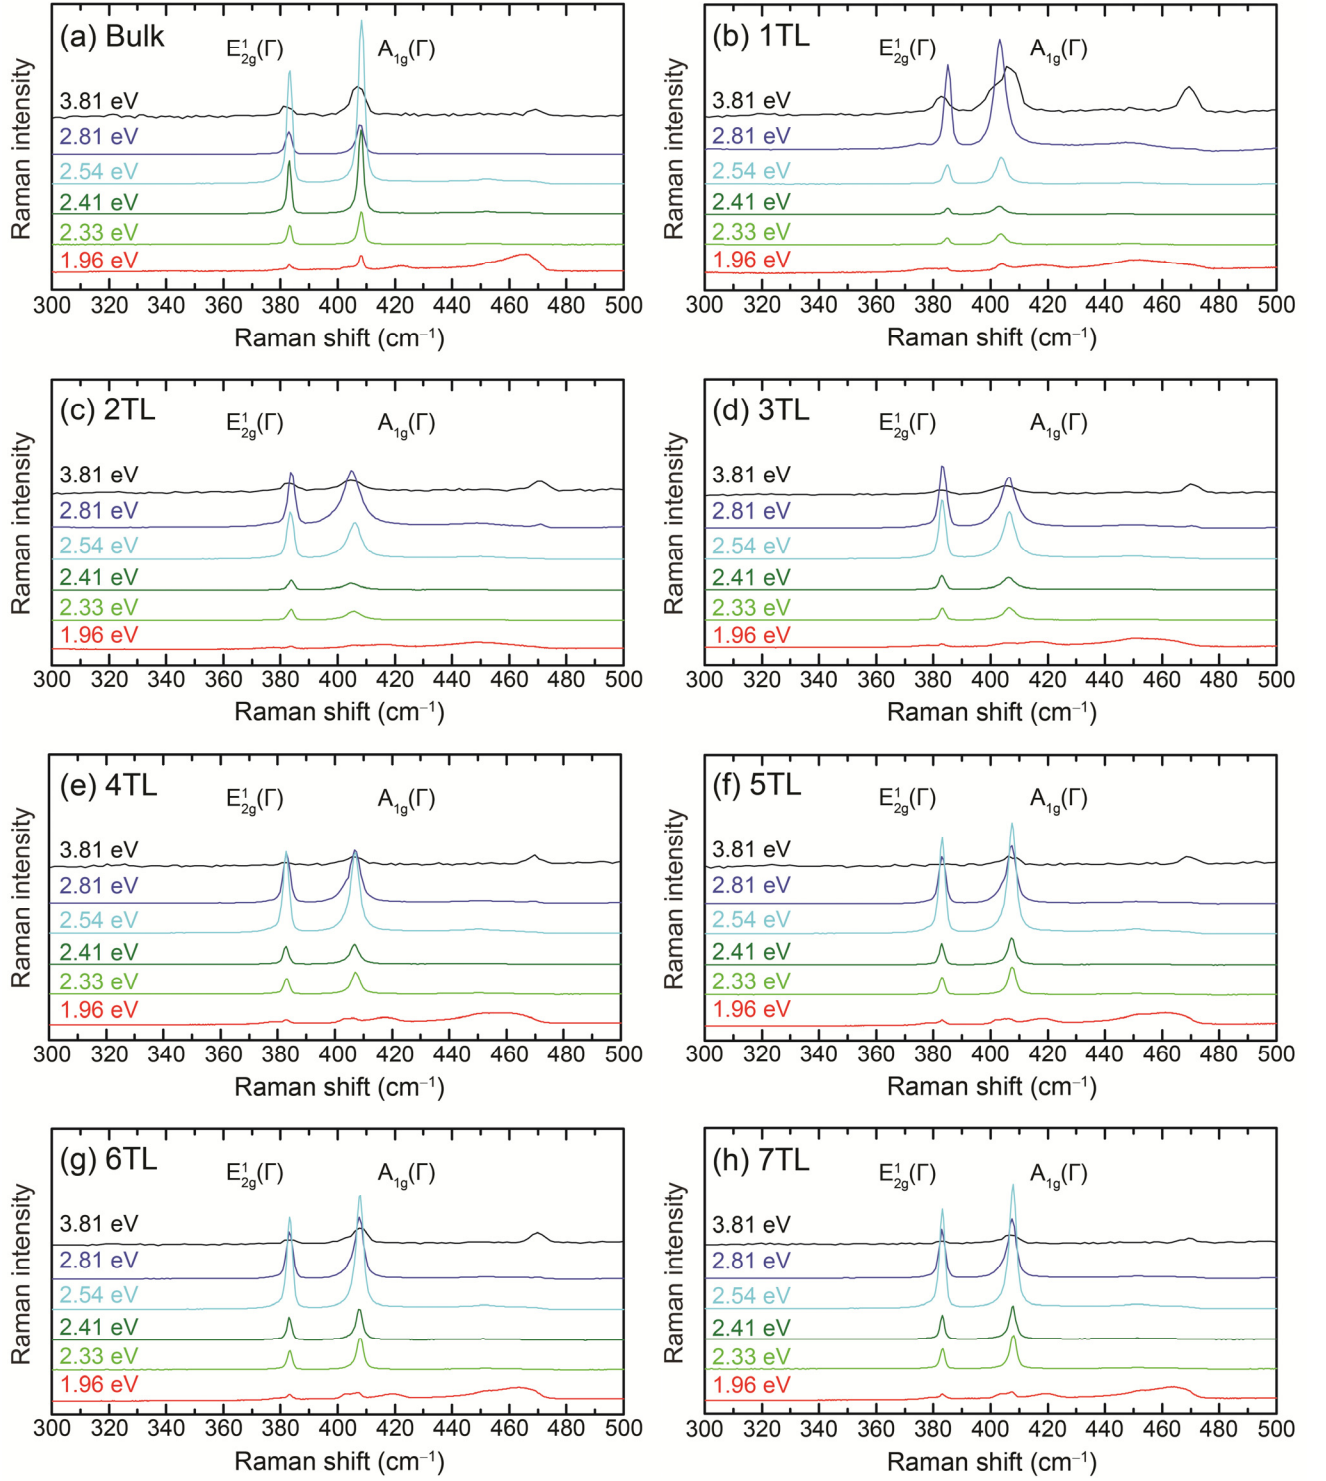

**Figure S7.** Dependence of  $E_{2g}^1$  and  $A_{1g}$  modes on excitation energies for (a) bulk and (b) 1TL – (h) 7TL MoS<sub>2</sub>.



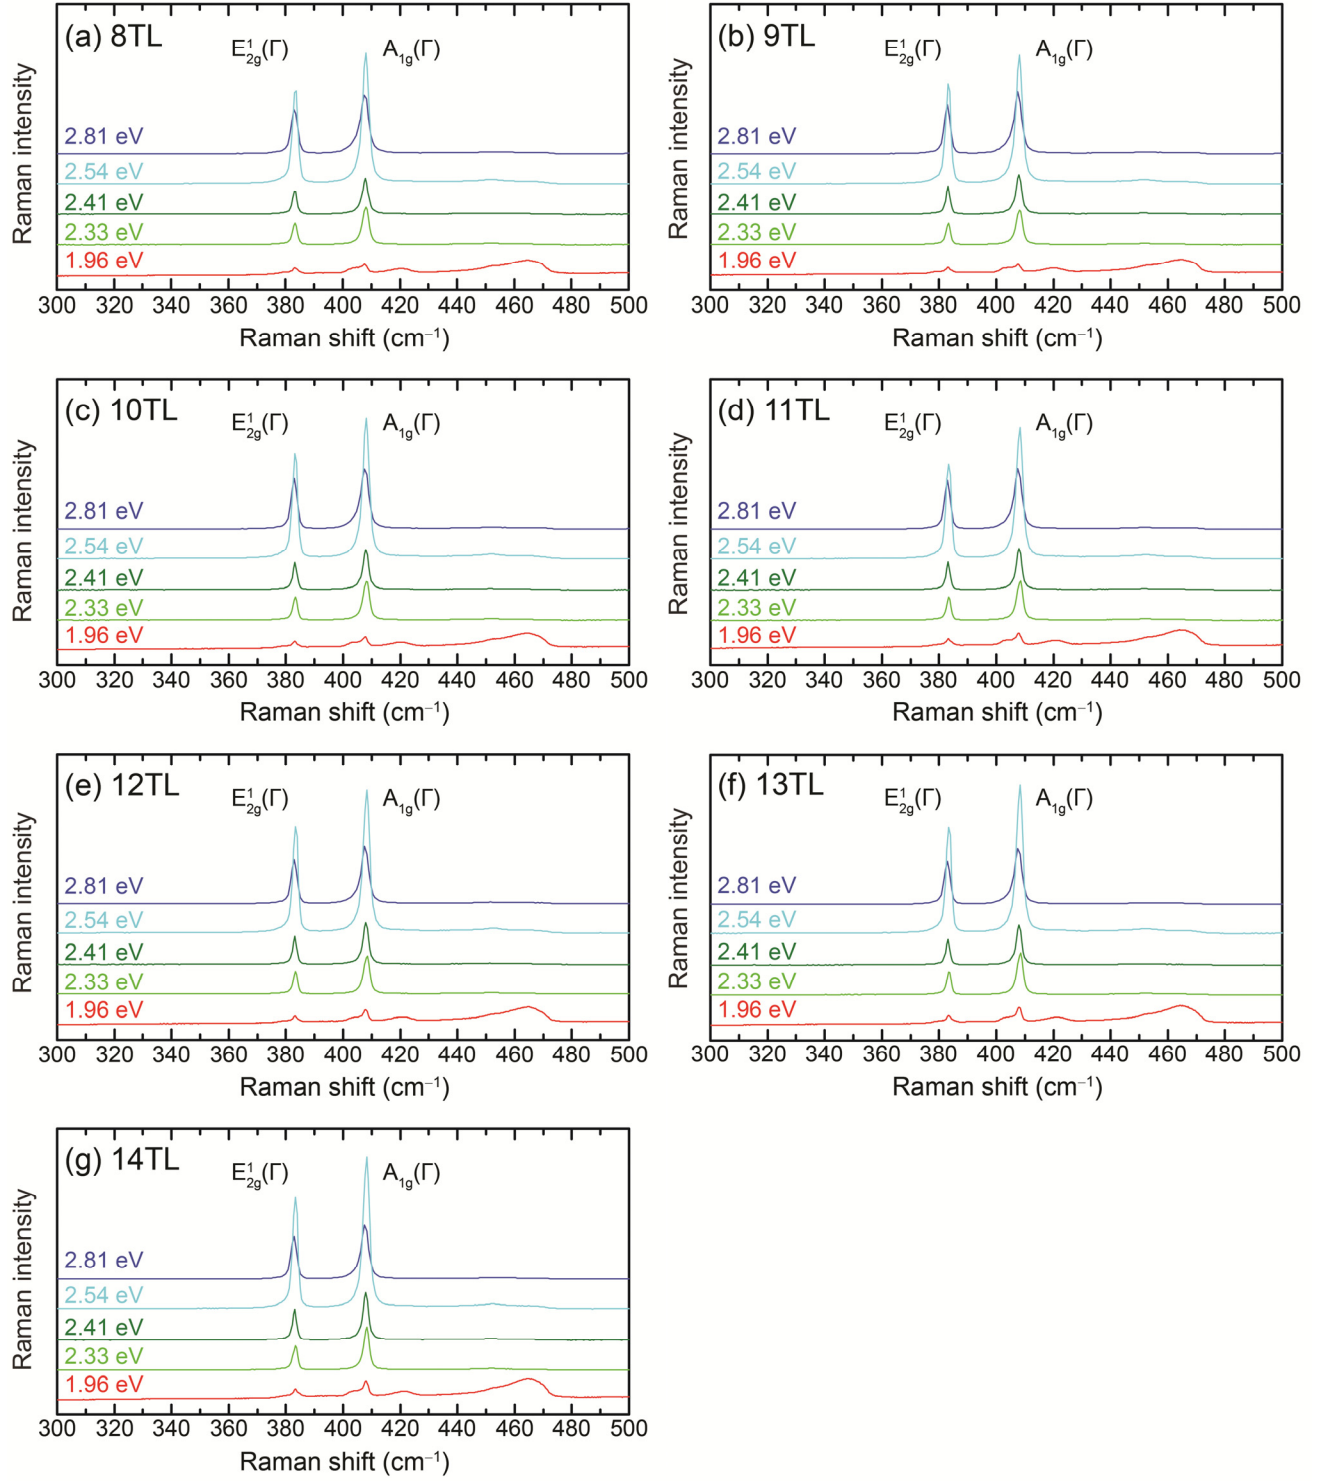

**Figure S8.** Dependence of  $E_{2g}^1$  and  $A_{1g}$  modes on excitation energies for (a) 8TL – (g) 14TL MoS<sub>2</sub>.

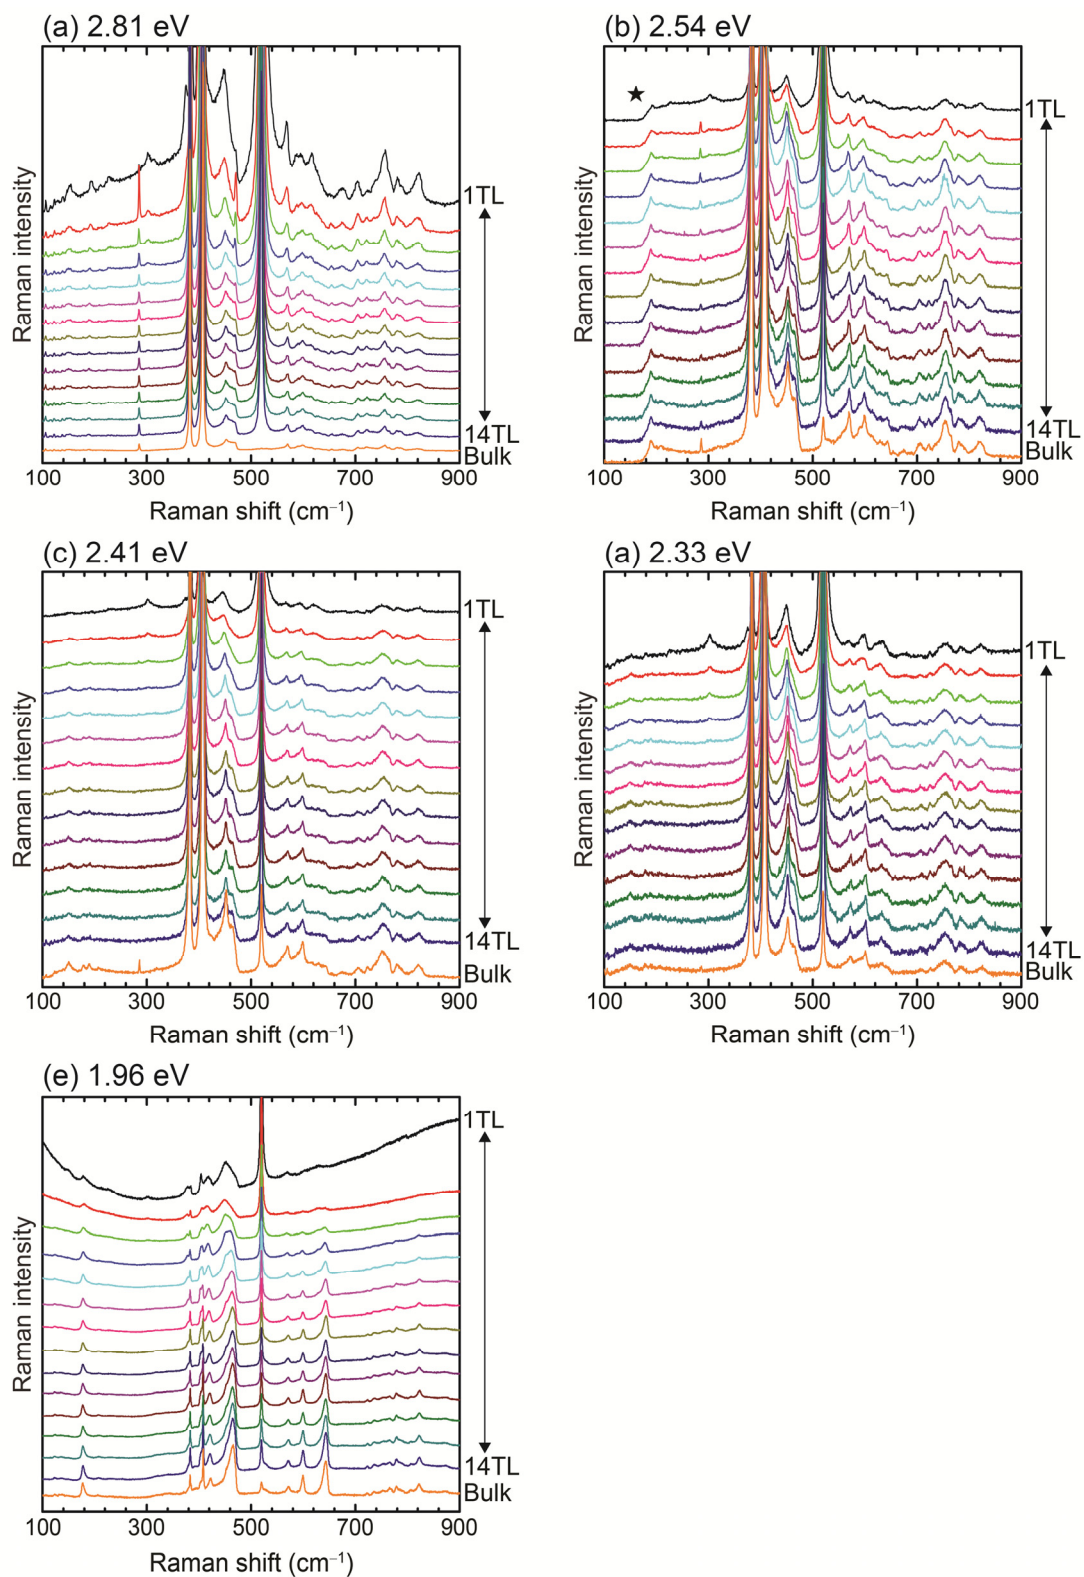

**Figure S9.** Thickness dependence of the Raman spectrum of MoS<sub>2</sub> measured with 5 excitation (a) 2.81 eV, (b) 2.54 eV, (c) 2.41 eV, (d) 2.33 eV, and (e) 1.96 eV. Features indicated by (★) are experimental artefacts due to the cutoff of the edge filters.

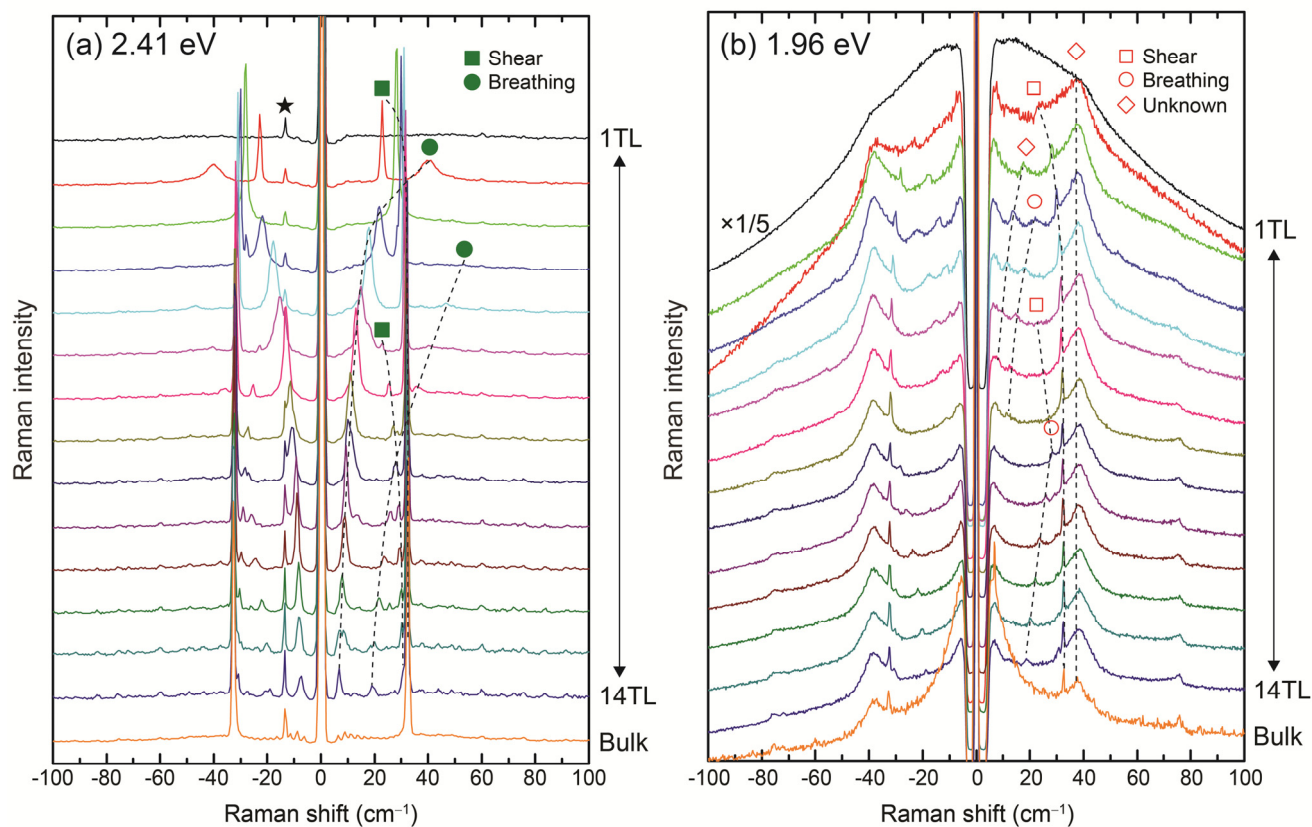

**Figure S10.** Low-frequency Raman spectra of MoS<sub>2</sub> measured with excitation energies of (a) 2.41 eV and (b) 1.96 eV. A plasma line of the 2.41-eV laser is indicated by (★).

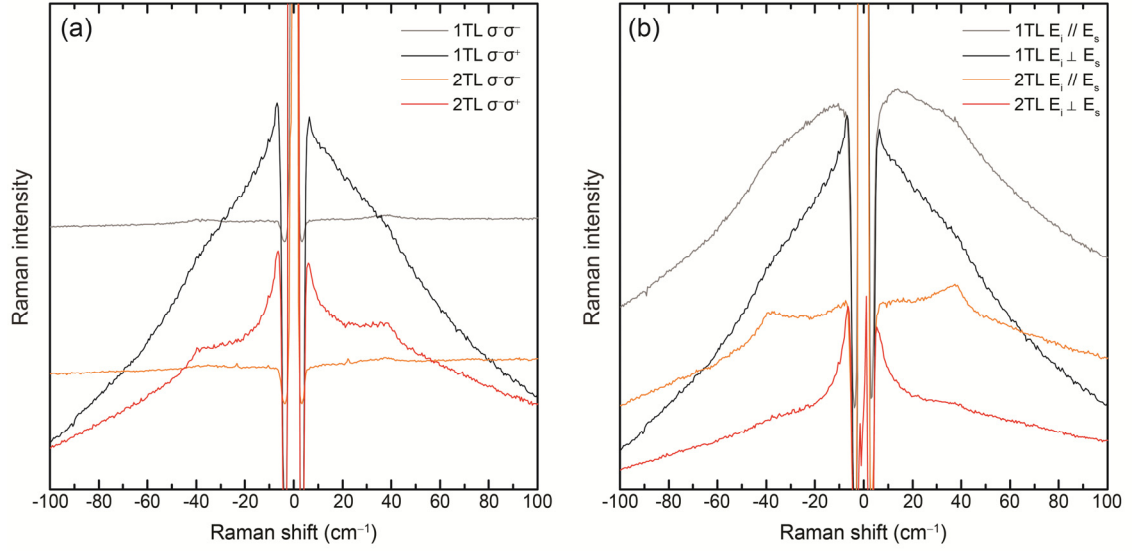

**Figure S11.** Polarization dependence of the low-frequency Raman spectra of 1TL and 2TL MoS<sub>2</sub> measured with excitation energy of 1.96 eV: (a) circular and (b) linear polarization dependence. In backscattering geometry,  $(\sigma^-\sigma^+)$  or  $(\sigma^+\sigma^-)$  correspond to spin-conserving scattering. (a) shows that the ‘central peak’ is due to a spin-conserving scattering mechanism.

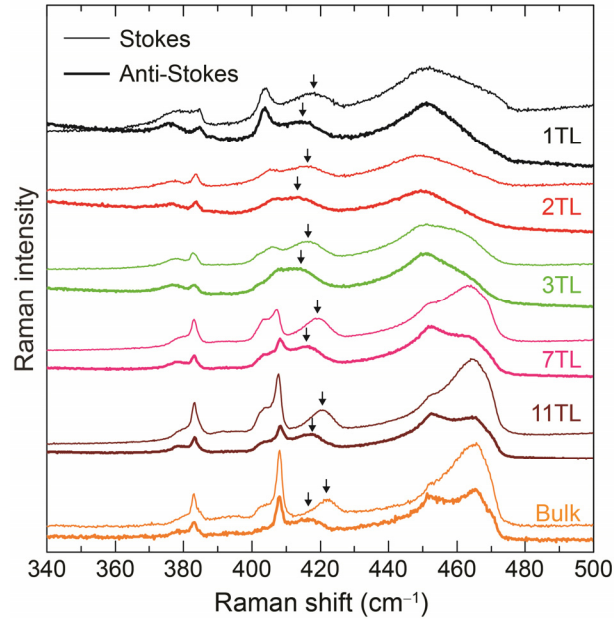

**Figure S12.** Comparison of Stokes and anti-Stokes Raman spectra of few-layer MoS<sub>2</sub> for an excitation energy of 1.96 eV. The peak *c* indicated by arrows exhibits a clear displacement between Stokes and anti-Stokes scattering.
